# Supplementary material
Source: MDPI journal article supplement (https://www.mdpi.com/2077-0472/13/4/895)
Supplement: s1 [file s1]

**Table S1.** Correlation coefficient between multi-scale feature and LCD.

| Features |         | LCD    |        |        |        |        |
|----------|---------|--------|--------|--------|--------|--------|
|          |         | V6     | V8     | V11    | V16    | R1     |
| GLCM     | ASM_B1  | 0.337  | 0.203  | 0.097  | -0.360 | -0.206 |
|          | ASM_B2  | 0.458  | 0.249  | 0.387  | -0.074 | 0.007  |
|          | ASM_B3  | 0.393  | 0.081  | -0.292 | -0.287 | -0.167 |
|          | ASM_B4  | 0.347  | 0.271  | 0.384  | 0.038  | 0.158  |
|          | ASM_B5  | -0.017 | 0.284  | 0.381  | 0.014  | 0.118  |
|          | Con_B1  | -0.468 | -0.250 | -0.032 | 0.239  | 0.222  |
|          | Con_B2  | -0.527 | -0.243 | -0.217 | -0.030 | 0.075  |
|          | Con_B3  | -0.461 | -0.191 | 0.328  | 0.151  | 0.178  |
|          | Con_B4  | -0.427 | -0.273 | -0.215 | -0.176 | -0.034 |
|          | Con_B5  | 0.096  | -0.270 | -0.085 | -0.341 | -0.134 |
|          | Cor_B1  | 0.160  | 0.059  | -0.097 | 0.171  | 0.108  |
|          | Cor_B2  | 0.097  | 0.203  | 0.045  | 0.039  | -0.209 |
|          | Cor_B3  | 0.153  | 0.097  | 0.489  | 0.264  | 0.182  |
|          | Cor_B4  | 0.166  | 0.320  | 0.151  | 0.150  | -0.200 |
|          | Cor_B5  | 0.266  | 0.362  | 0.520  | 0.375  | -0.010 |
|          | Dis_B1  | -0.439 | -0.247 | -0.039 | 0.272  | 0.198  |
|          | Dis_B2  | -0.510 | -0.247 | -0.246 | -0.008 | 0.028  |
|          | Dis_B3  | -0.458 | -0.185 | 0.347  | 0.191  | 0.171  |
|          | Dis_B4  | -0.386 | -0.272 | -0.236 | -0.135 | -0.071 |
|          | Dis_B5  | 0.069  | -0.273 | -0.122 | -0.243 | -0.156 |
|          | Ent_B1  | -0.362 | -0.219 | -0.080 | 0.324  | 0.188  |
|          | Ent_B2  | -0.476 | -0.244 | -0.364 | 0.044  | -0.023 |
|          | Ent_B3  | -0.422 | -0.131 | 0.361  | 0.254  | 0.168  |
|          | Ent_B4  | -0.348 | -0.272 | -0.347 | -0.035 | -0.141 |
|          | Ent_B5  | 0.021  | -0.273 | -0.305 | -0.034 | -0.115 |
|          | Hom_B1  | 0.396  | 0.242  | 0.074  | -0.290 | -0.177 |
|          | Hom_B2  | 0.484  | 0.251  | 0.318  | -0.022 | 0.016  |
|          | Hom_B3  | 0.460  | 0.163  | -0.344 | -0.227 | -0.158 |
|          | Hom_B4  | 0.329  | 0.274  | 0.298  | 0.057  | 0.121  |
|          | Hom_B5  | -0.032 | 0.271  | 0.238  | 0.083  | 0.152  |
|          | MEAN_B1 | -0.374 | -0.195 | 0.405  | 0.229  | -0.367 |
|          | MEAN_B2 | -0.437 | -0.168 | 0.130  | 0.057  | 0.241  |
|          | MEAN_B3 | -0.373 | -0.181 | 0.496  | 0.158  | 0.085  |
|          | MEAN_B4 | -0.482 | -0.147 | 0.033  | 0.018  | 0.178  |
|          | MEAN_B5 | -0.428 | -0.225 | -0.306 | -0.050 | -0.004 |
|          | Var_B1  | -0.419 | -0.219 | -0.011 | 0.233  | 0.230  |
|          | Var_B2  | -0.482 | -0.209 | -0.165 | 0.000  | 0.070  |
|          | Var_B3  | -0.388 | -0.171 | 0.366  | 0.155  | 0.181  |
|          | Var_B4  | -0.389 | -0.244 | -0.153 | -0.102 | -0.027 |
|          | Var_B5  | 0.193  | -0.231 | 0.027  | -0.126 | -0.089 |
| VI       | B1      | -0.374 | -0.168 | 0.405  | 0.228  | 0.241  |

|     |                         |        |        |        |        |        |
|-----|-------------------------|--------|--------|--------|--------|--------|
| DWT | B2                      | -0.437 | -0.181 | 0.129  | 0.058  | 0.085  |
|     | B3                      | -0.373 | -0.147 | 0.496  | 0.158  | 0.178  |
|     | B4                      | -0.482 | -0.225 | 0.033  | 0.018  | -0.004 |
|     | B5                      | -0.428 | -0.281 | -0.306 | -0.050 | -0.048 |
|     | CI <sub>rededge</sub>   | 0.403  | 0.033  | -0.530 | -0.049 | -0.100 |
|     | DVI                     | 0.250  | -0.236 | -0.397 | -0.093 | -0.076 |
|     | EVI                     | 0.277  | -0.126 | -0.513 | -0.077 | -0.097 |
|     | GNDVI                   | 0.393  | 0.019  | -0.460 | -0.057 | -0.152 |
|     | MTCI                    | 0.410  | -0.281 | -0.233 | 0.070  | -0.048 |
|     | NDVI                    | 0.326  | 0.072  | -0.631 | -0.149 | 0.104  |
|     | NDVI <sub>rededge</sub> | 0.409  | 0.037  | -0.500 | -0.028 | -0.225 |
|     | OSAVI                   | 0.312  | 0.057  | -0.599 | -0.136 | -0.070 |
|     | PPR                     | 0.091  | -0.018 | -0.573 | -0.552 | -0.185 |
|     | SIPI                    | -0.286 | 0.021  | 0.587  | 0.047  | -0.564 |
|     | TCARI                   | 0.090  | -0.065 | -0.679 | -0.423 | 0.064  |
|     | TCARIOSAVI              | -0.273 | -0.259 | -0.672 | -0.490 | -0.424 |
|     | MCARI                   | 0.090  | -0.195 | -0.679 | -0.423 | -0.367 |
|     | B1_HH                   | -0.111 | -0.026 | 0.138  | -0.127 | 0.287  |
|     | B1_HL                   | 0.160  | 0.089  | 0.084  | -0.110 | 0.226  |
|     | B1_LH                   | 0.030  | 0.292  | -0.142 | -0.032 | -0.083 |
|     | B1_LL                   | -0.376 | -0.174 | 0.409  | 0.219  | 0.246  |
|     | B2_HH                   | -0.120 | -0.188 | 0.133  | 0.046  | -0.050 |
|     | B2_HL                   | 0.072  | 0.111  | -0.048 | -0.100 | 0.311  |
|     | B2_LH                   | -0.104 | 0.072  | -0.072 | -0.102 | -0.044 |
|     | B2_LL                   | -0.438 | -0.185 | 0.125  | 0.032  | 0.089  |
|     | B3_HH                   | -0.142 | -0.149 | -0.192 | -0.122 | 0.185  |
|     | B3_HL                   | 0.078  | 0.035  | 0.030  | -0.067 | 0.231  |
|     | B3_LH                   | -0.163 | 0.236  | -0.032 | -0.132 | -0.033 |
|     | B3_LL                   | -0.374 | -0.150 | 0.500  | 0.134  | 0.184  |
|     | B4_HH                   | 0.048  | -0.137 | -0.202 | -0.166 | -0.103 |
|     | B4_HL                   | -0.026 | 0.179  | -0.087 | -0.102 | 0.322  |
|     | B4_LH                   | -0.304 | 0.041  | -0.161 | -0.140 | -0.051 |
|     | B4_LL                   | -0.480 | -0.232 | 0.030  | -0.011 | 0.000  |
|     | B5_HH                   | -0.159 | -0.300 | 0.027  | -0.036 | 0.089  |
|     | B5_HL                   | -0.201 | 0.100  | -0.029 | -0.148 | -0.029 |
|     | B5_LH                   | -0.063 | -0.085 | -0.204 | 0.100  | 0.068  |
|     | B5_LL                   | -0.410 | -0.287 | -0.305 | -0.045 | -0.052 |

**Table S2.** Correlation coefficient between multi-scale feature and LAI.

| Features |         | LAI    |        |        |        |        |
|----------|---------|--------|--------|--------|--------|--------|
|          |         | V6     | V8     | V11    | V16    | R1     |
| GLCM     | ASM_B1  | 0.493  | 0.799  | 0.047  | 0.727  | 0.221  |
|          | ASM_B2  | 0.378  | 0.726  | -0.245 | 0.578  | -0.121 |
|          | ASM_B3  | 0.580  | 0.824  | 0.472  | 0.849  | 0.301  |
|          | ASM_B4  | -0.168 | 0.541  | -0.268 | 0.409  | -0.320 |
|          | ASM_B5  | -0.654 | -0.269 | -0.367 | -0.363 | -0.434 |
|          | Con_B1  | -0.390 | -0.685 | -0.117 | -0.718 | -0.030 |
|          | Con_B2  | -0.221 | -0.592 | -0.038 | -0.675 | 0.228  |
|          | Con_B3  | -0.272 | -0.677 | -0.572 | -0.839 | -0.144 |
|          | Con_B4  | 0.120  | -0.431 | 0.016  | -0.559 | 0.355  |
|          | Con_B5  | 0.725  | 0.099  | -0.011 | 0.563  | 0.482  |
|          | Cor_B1  | -0.301 | -0.789 | 0.074  | 0.026  | 0.273  |
|          | Cor_B2  | -0.412 | -0.554 | -0.200 | 0.225  | 0.533  |
|          | Cor_B3  | -0.288 | -0.787 | -0.636 | -0.489 | -0.137 |
|          | Cor_B4  | -0.305 | -0.253 | -0.297 | 0.274  | 0.637  |
|          | Cor_B5  | -0.002 | 0.303  | -0.666 | 0.076  | 0.393  |
|          | Dis_B1  | -0.398 | -0.725 | -0.090 | -0.748 | -0.032 |
|          | Dis_B2  | -0.213 | -0.619 | 0.025  | -0.674 | 0.257  |
|          | Dis_B3  | -0.310 | -0.739 | -0.573 | -0.865 | -0.164 |
|          | Dis_B4  | 0.188  | -0.433 | 0.059  | -0.569 | 0.380  |
|          | Dis_B5  | 0.717  | 0.168  | 0.038  | 0.447  | 0.481  |
|          | Ent_B1  | -0.491 | -0.782 | -0.043 | -0.760 | -0.115 |
|          | Ent_B2  | -0.363 | -0.689 | 0.214  | -0.635 | 0.238  |
|          | Ent_B3  | -0.569 | -0.818 | -0.546 | -0.866 | -0.230 |
|          | Ent_B4  | 0.198  | -0.472 | 0.231  | -0.497 | 0.383  |
|          | Ent_B5  | 0.672  | 0.299  | 0.277  | 0.329  | 0.460  |
|          | Hom_B1  | 0.437  | 0.752  | 0.036  | 0.752  | 0.078  |
|          | Hom_B2  | 0.250  | 0.651  | -0.149 | 0.641  | -0.256 |
|          | Hom_B3  | 0.458  | 0.796  | 0.535  | 0.865  | 0.200  |
|          | Hom_B4  | -0.268 | 0.442  | -0.157 | 0.536  | -0.385 |
|          | Hom_B5  | -0.691 | -0.268 | -0.182 | -0.287 | -0.467 |
|          | MEAN_B1 | -0.681 | -0.825 | -0.688 | 0.774  | -0.472 |
|          | MEAN_B2 | -0.662 | -0.798 | -0.478 | -0.828 | -0.321 |
|          | MEAN_B3 | -0.723 | -0.811 | -0.772 | -0.833 | -0.476 |
|          | MEAN_B4 | -0.649 | -0.728 | -0.325 | -0.859 | -0.130 |
|          | MEAN_B5 | -0.091 | -0.353 | 0.259  | -0.823 | 0.402  |
|          | Var_B1  | -0.445 | -0.716 | -0.158 | -0.686 | -0.010 |
|          | Var_B2  | -0.334 | -0.632 | -0.122 | -0.680 | 0.253  |
|          | Var_B3  | -0.349 | -0.698 | -0.621 | -0.829 | -0.150 |
|          | Var_B4  | 0.027  | -0.463 | -0.083 | -0.603 | 0.371  |
|          | Var_B5  | 0.738  | 0.139  | -0.169 | 0.612  | 0.461  |
| VI       | B1      | -0.681 | -0.825 | -0.688 | -0.824 | -0.472 |

|     |                         |        |        |        |        |        |
|-----|-------------------------|--------|--------|--------|--------|--------|
| DWT | B2                      | -0.662 | -0.799 | -0.477 | -0.834 | -0.322 |
|     | B3                      | -0.723 | -0.811 | -0.772 | -0.856 | -0.476 |
|     | B4                      | -0.648 | -0.728 | -0.325 | -0.823 | -0.130 |
|     | B5                      | -0.091 | -0.354 | 0.259  | 0.851  | 0.402  |
|     | CI <sub>rededge</sub>   | 0.714  | 0.846  | 0.860  | 0.911  | 0.769  |
|     | DVI                     | 0.771  | 0.210  | 0.400  | 0.911  | 0.486  |
|     | EVI                     | 0.768  | 0.642  | 0.568  | 0.914  | 0.552  |
|     | GNDVI                   | 0.705  | 0.832  | 0.795  | 0.881  | 0.761  |
|     | MTCI                    | 0.148  | 0.512  | 0.631  | 0.850  | 0.661  |
|     | NDVI                    | 0.752  | 0.833  | 0.852  | 0.838  | 0.743  |
|     | NDVI <sub>rededge</sub> | 0.721  | 0.841  | 0.840  | 0.878  | 0.745  |
|     | OSAVI                   | 0.760  | 0.788  | 0.731  | 0.884  | 0.710  |
|     | PPR                     | 0.573  | 0.691  | 0.456  | 0.902  | 0.608  |
|     | SIPI                    | -0.751 | -0.789 | -0.823 | 0.641  | -0.601 |
|     | TCARI                   | 0.686  | 0.611  | 0.620  | -0.845 | 0.597  |
|     | TCARIOSAVI              | 0.329  | 0.405  | 0.571  | 0.638  | 0.555  |
|     | MCARI                   | 0.686  | 0.611  | 0.620  | 0.774  | 0.597  |
|     | B1_HH                   | -0.137 | -0.008 | -0.218 | -0.367 | -0.046 |
|     | B1_HL                   | 0.074  | 0.137  | -0.363 | -0.300 | -0.248 |
|     | B1_LH                   | 0.021  | -0.071 | -0.030 | 0.352  | 0.083  |
|     | B1_LL                   | -0.677 | -0.816 | -0.693 | -0.818 | -0.466 |
|     | B2_HH                   | -0.101 | 0.364  | 0.052  | 0.010  | 0.032  |
|     | B2_HL                   | 0.113  | 0.098  | -0.108 | -0.093 | -0.196 |
|     | B2_LH                   | 0.012  | -0.042 | -0.086 | 0.096  | 0.044  |
|     | B2_LL                   | -0.659 | -0.790 | -0.481 | -0.823 | -0.315 |
|     | B3_HH                   | -0.120 | 0.234  | 0.088  | 0.154  | -0.043 |
|     | B3_HL                   | 0.161  | 0.155  | -0.137 | -0.267 | -0.287 |
|     | B3_LH                   | -0.179 | -0.127 | 0.206  | 0.318  | 0.069  |
|     | B3_LL                   | -0.727 | -0.803 | -0.774 | -0.844 | -0.472 |
|     | B4_HH                   | -0.128 | 0.037  | 0.107  | -0.189 | -0.082 |
|     | B4_HL                   | -0.035 | 0.060  | -0.121 | 0.165  | -0.134 |
|     | B4_LH                   | -0.068 | -0.139 | 0.129  | -0.047 | -0.020 |
|     | B4_LL                   | -0.647 | -0.721 | -0.331 | -0.821 | -0.123 |
|     | B5_HH                   | -0.071 | 0.141  | -0.043 | -0.037 | 0.047  |
|     | B5_HL                   | -0.189 | -0.226 | -0.142 | 0.351  | 0.004  |
|     | B5_LH                   | 0.200  | -0.088 | 0.122  | -0.378 | 0.021  |
|     | B5_LL                   | -0.076 | -0.347 | 0.249  | 0.842  | 0.407  |

**Table S3.** Correlation coefficient between multi-scale feature and CCD.

| Features |         | CCD    |        |        |        |        |
|----------|---------|--------|--------|--------|--------|--------|
|          |         | V6     | V8     | V11    | V16    | R1     |
| GLCM     | ASM_B1  | 0.513  | 0.826  | 0.090  | 0.442  | 0.090  |
|          | ASM_B2  | 0.444  | 0.761  | -0.166 | 0.508  | -0.121 |
|          | ASM_B3  | 0.609  | 0.825  | 0.462  | 0.610  | 0.194  |
|          | ASM_B4  | -0.087 | 0.584  | -0.199 | 0.425  | -0.226 |
|          | ASM_B5  | -0.601 | -0.204 | -0.338 | -0.318 | -0.354 |
|          | Con_B1  | -0.442 | -0.723 | -0.160 | -0.513 | 0.103  |
|          | Con_B2  | -0.312 | -0.628 | -0.121 | -0.657 | 0.274  |
|          | Con_B3  | -0.334 | -0.701 | -0.580 | -0.686 | -0.030 |
|          | Con_B4  | 0.027  | -0.476 | -0.045 | -0.646 | 0.338  |
|          | Con_B5  | 0.681  | 0.044  | -0.015 | 0.311  | 0.410  |
|          | Cor_B1  | -0.265 | -0.759 | 0.060  | 0.120  | 0.329  |
|          | Cor_B2  | -0.375 | -0.499 | -0.202 | 0.250  | 0.403  |
|          | Cor_B3  | -0.254 | -0.748 | -0.596 | -0.287 | -0.020 |
|          | Cor_B4  | -0.262 | -0.183 | -0.283 | 0.357  | 0.509  |
|          | Cor_B5  | 0.035  | 0.372  | -0.582 | 0.320  | 0.381  |
|          | Dis_B1  | -0.444 | -0.762 | -0.125 | -0.519 | 0.089  |
|          | Dis_B2  | -0.302 | -0.656 | -0.052 | -0.644 | 0.275  |
|          | Dis_B3  | -0.368 | -0.762 | -0.570 | -0.686 | -0.052 |
|          | Dis_B4  | 0.097  | -0.477 | 0.000  | -0.631 | 0.341  |
|          | Dis_B5  | 0.668  | 0.111  | 0.033  | 0.266  | 0.395  |
|          | Ent_B1  | -0.516 | -0.811 | -0.076 | -0.498 | 0.003  |
|          | Ent_B2  | -0.434 | -0.723 | 0.141  | -0.578 | 0.227  |
|          | Ent_B3  | -0.604 | -0.829 | -0.525 | -0.648 | -0.121 |
|          | Ent_B4  | 0.114  | -0.515 | 0.172  | -0.503 | 0.301  |
|          | Ent_B5  | 0.618  | 0.238  | 0.258  | 0.279  | 0.388  |
|          | Hom_B1  | 0.471  | 0.787  | 0.067  | 0.512  | -0.032 |
|          | Hom_B2  | 0.329  | 0.687  | -0.077 | 0.594  | -0.249 |
|          | Hom_B3  | 0.505  | 0.813  | 0.521  | 0.663  | 0.096  |
|          | Hom_B4  | -0.184 | 0.485  | -0.097 | 0.550  | -0.316 |
|          | Hom_B5  | -0.638 | -0.209 | -0.165 | -0.217 | -0.378 |
|          | MEAN_B1 | -0.691 | 0.563  | -0.708 | -0.624 | -0.313 |
|          | MEAN_B2 | -0.692 | -0.846 | -0.540 | -0.740 | -0.253 |
|          | MEAN_B3 | -0.732 | -0.822 | -0.775 | -0.701 | -0.351 |
|          | MEAN_B4 | -0.685 | -0.828 | -0.378 | -0.760 | -0.114 |
|          | MEAN_B5 | -0.174 | -0.761 | 0.222  | 0.761  | 0.380  |
|          | Var_B1  | -0.487 | -0.747 | -0.201 | -0.486 | 0.126  |
|          | Var_B2  | -0.411 | -0.661 | -0.201 | -0.637 | 0.296  |
|          | Var_B3  | -0.397 | -0.718 | -0.629 | -0.673 | -0.034 |
|          | Var_B4  | -0.058 | -0.502 | -0.143 | -0.636 | 0.359  |
|          | Var_B5  | 0.705  | 0.091  | -0.167 | 0.500  | 0.418  |
| VI       | B1      | -0.690 | -0.846 | -0.708 | -0.622 | -0.313 |

|     |                         |        |        |        |        |        |
|-----|-------------------------|--------|--------|--------|--------|--------|
| DWT | B2                      | -0.691 | -0.822 | -0.539 | -0.740 | -0.253 |
|     | B3                      | -0.731 | -0.828 | -0.775 | -0.698 | -0.352 |
|     | B4                      | -0.685 | -0.761 | -0.378 | -0.760 | -0.114 |
|     | B5                      | -0.174 | -0.403 | 0.222  | 0.761  | 0.380  |
|     | CI <sub>rededge</sub>   | 0.731  | 0.835  | 0.868  | 0.820  | 0.691  |
|     | DVI                     | 0.748  | 0.161  | 0.364  | 0.790  | 0.444  |
|     | EVI                     | 0.753  | 0.608  | 0.526  | 0.805  | 0.495  |
|     | GNDVI                   | 0.723  | 0.822  | 0.825  | 0.785  | 0.654  |
|     | MTCI                    | 0.208  | -0.402 | 0.696  | 0.831  | 0.702  |
|     | NDVI                    | 0.750  | 0.513  | 0.833  | 0.724  | 0.590  |
|     | NDVI <sub>rededge</sub> | 0.737  | 0.827  | 0.861  | 0.809  | 0.683  |
|     | OSAVI                   | 0.753  | 0.838  | 0.698  | 0.755  | 0.593  |
|     | PPR                     | 0.521  | 0.772  | 0.367  | 0.234  | 0.269  |
|     | SIPI                    | -0.736 | 0.685  | -0.812 | -0.761 | -0.536 |
|     | TCARI                   | 0.642  | -0.792 | 0.513  | 0.436  | 0.378  |
|     | TCARIOSAVI              | 0.248  | 0.347  | 0.454  | 0.263  | 0.303  |
|     | MCARI                   | 0.642  | 0.563  | 0.513  | 0.436  | 0.378  |
|     | B1_HH                   | -0.153 | -0.019 | -0.237 | -0.414 | 0.167  |
|     | B1_HL                   | 0.078  | 0.162  | -0.427 | -0.332 | -0.086 |
|     | B1_LH                   | 0.011  | -0.007 | -0.101 | 0.315  | 0.040  |
|     | B1_LL                   | -0.688 | -0.839 | -0.714 | -0.622 | -0.304 |
|     | B2_HH                   | -0.131 | 0.319  | 0.124  | 0.062  | 0.042  |
|     | B2_HL                   | 0.100  | 0.129  | -0.171 | -0.148 | 0.019  |
|     | B2_LH                   | -0.030 | -0.028 | -0.149 | 0.025  | 0.031  |
|     | B2_LL                   | -0.690 | -0.815 | -0.547 | -0.747 | -0.245 |
|     | B3_HH                   | -0.132 | 0.206  | 0.038  | 0.091  | 0.080  |
|     | B3_HL                   | 0.143  | 0.169  | -0.159 | -0.264 | -0.127 |
|     | B3_LH                   | -0.195 | -0.071 | 0.243  | 0.214  | 0.053  |
|     | B3_LL                   | -0.736 | -0.821 | -0.776 | -0.701 | -0.344 |
|     | B4_HH                   | -0.115 | -0.001 | 0.020  | -0.274 | -0.136 |
|     | B4_HL                   | -0.056 | 0.100  | -0.200 | 0.094  | 0.086  |
|     | B4_LH                   | -0.137 | -0.130 | 0.077  | -0.132 | -0.044 |
|     | B4_LL                   | -0.683 | -0.756 | -0.390 | -0.776 | -0.106 |
|     | B5_HH                   | -0.098 | 0.068  | -0.073 | -0.010 | 0.121  |
|     | B5_HL                   | -0.212 | -0.206 | -0.208 | 0.213  | 0.004  |
|     | B5_LH                   | 0.157  | -0.098 | 0.061  | -0.307 | 0.054  |
|     | B5_LL                   | -0.150 | -0.398 | 0.208  | 0.757  | 0.382  |

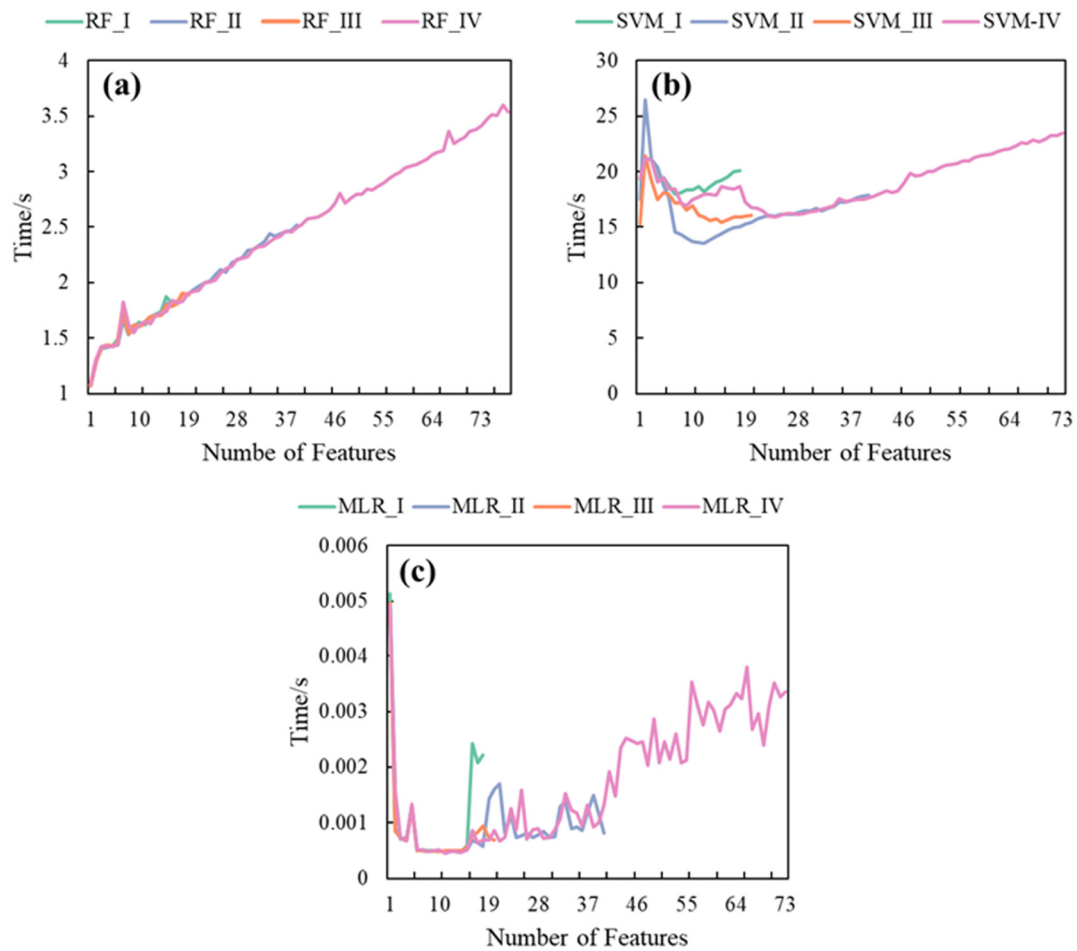

Figure S1. The time used by the three methods trained on the validation set after four feature datasets. (a)–(c) represent the running time of RF, SVM, and MLR. RF\_I, RF\_II, RF\_III, and RF\_IV is the time used for the RF method trained using dataset I, dataset II, dataset III, and dataset IV, respectively. Similarly, MLR\_I, MLR\_II, MLR\_III, MLR\_IV, SVM\_I, SVM\_II, SVM\_III, and SVM\_IV, respectively are the same as RF\_I, RF\_II, RF\_III, RF\_IV.
